# Supplementary material
Source: HighWire-hosted journal article supplement (https://cmajopen.ca/highwire/filestream/80872/field_highwire_adjunct_files/6/open-2014-0060-7-at.pdf)
Supplement: open-2014-0060-7-at.pdf [file open-2014-0060-7-at.pdf]

Appendix 7 (as supplied by the authors): Proportion of sitagliptin and alternative hypoglycemic agent users with at least one amylase or lipase test during 90 days of follow-up

| Test                         | Weighted % of sitagliptin users (unweighted %) | Weighted % of alternative hypoglycemic agent users (unweighted %) |
|------------------------------|------------------------------------------------|-------------------------------------------------------------------|
| Serum amylase or lipase test | 0.90% (0.90%)                                  | 0.86% (0.85%)                                                     |
